# Supplementary material for: Multimodal sensing in rewritable, data matrix azobenzene-based devices
Source: Royal Society of Chemistry journal article supplement (doi:10.1039/d2tc01565j), 2022-01-01
Supplement: d2tc01565j1.pdf [file d2tc01565j1.pdf]

## Multimodal sensing in rewritable, datamatrix azobenzene-based devices

Alex Boschi, Simone Cinili, Eva Bystrenova, Giampiero Ruani, Jessica Groppi, Alberto Credi, Massimo Baroncini\*, Andrea Candini\*<sup>a</sup>, Denis Gentili\* and Massimiliano Cavallini\*

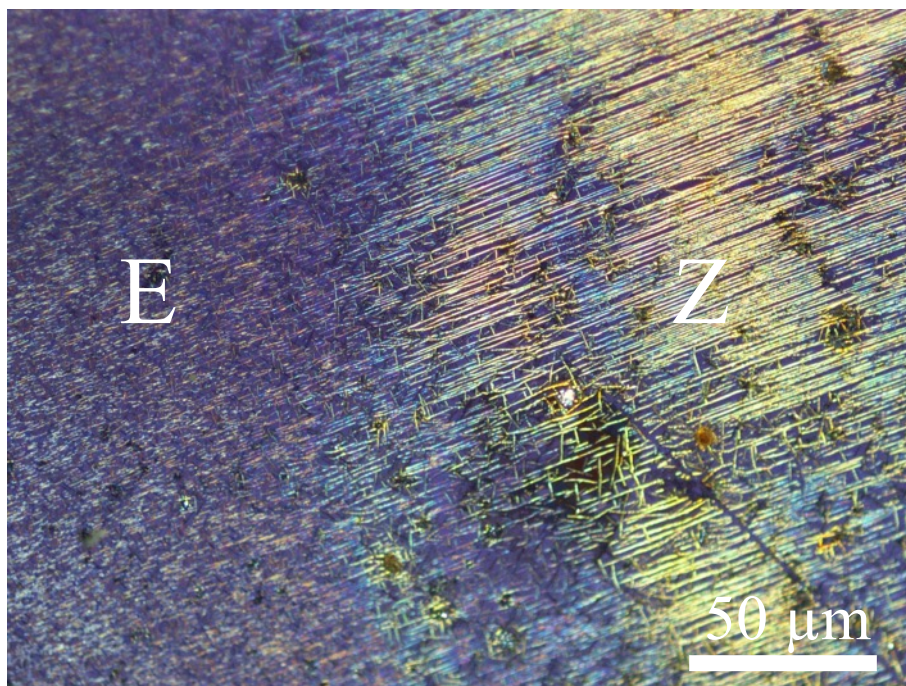

**Figure S1.** Optical micrographs of printed submicrometric structures of **1** and effect of local UV treatment taken with cross polars (Left part in the image).
